# Supplementary material for: Synthetic dietary inulin, Fuji FF, delays development of diet-induced obesity by improving gut microbiota profiles and increasing short-chain fatty acid production
Source: PeerJ. 2020 Apr 8;8:e8893. doi: 10.7717/peerj.8893 (PMC7150546; doi:10.7717/peerj.8893)
Supplement: Supplemental Information 1 [file peerj-08-8893-s001.xlsx]

## Sheet: Figure 1A
	4wk	5wk	6wk	7wk	8wk	9wk	10wk	11wk	12wk	13wk	14wk	15wk	16wk
Cellulose1	13.86	19.41	21.42	22.71	23.93	24.6	26.29	29.6	32.08	33.73	34.81	35.6	36.01
Cellulose2	16.13	21.33	23.23	24.56	26.13	27.17	28.97	32.19	34.16	35.57	35.57	36.65	37.3
Cellulose3	16.63	19.47	21.63	23.64	24.52	25.05	26.46	28.41	29.81	29.98	32.13	33.07	32.97
Cellulose4	16.65	20.66	23.14	25.41	27.59	28.18	31.58	34.16	36.11	36.23	37.89	39.17	40.67
Cellulose5	17.06	20.17	22.14	23.53	24.92	27.32	29.01	31.2	32.7	33.84	34.03	34.69	35.51
Cellulose6	17.3	19.97	21.79	23.46	25.4	26.87	28.75	30.81	31.69	33.84	34.3	34.85	35.12
Cellulose7	17.41	20.92	23.15	25.75	28.57	29.07	32	34.54	36.74	37.08	37.65	38.4	40.26
Cellulose8	17.73	21.09	22.84	24.35	26.27	26.68	29.9	31.84	33.28	34.5	34.48	34.97	35.5
Cellulose9	18.79	21.04	23.42	25.55	27.04	29.27	32.14	33.72	36.36	37.84	38.86	39.66	41.45
Cellulose10	19.29	22.61	25.52	27.17	29.25	32.24	35.49	37.08	38.17	39.77	40.55	41.69	42.67
Cellulose11	15.33	20.53	22.4	23.73	25.5	25.98	28.2	29.38	31.42	32.76	34.81	34.38	35.48
Cellulose12	15.42	21.18	21.82	23.76	24.46	26.02	29.22	30.31	33.64	35.76	37.86	37.13	38.89
Cellulose13	16.53	21.95	22.74	25.15	28.06	30.63	34.33	36.52	38.67	41.06	42.87	45.07	46.57
Cellulose14	17.55	21.21	22.74	25.1	26.23	28.51	31.34	33.8	35.8	37.97	40.4	41.55	43.37
Cellulose15	17.93	21.1	22.81	25.15	26.57	27.6	31.31	32.09	35.77	38.05	39.67	40.79	41.74
Cellulose16	18.4	21.84	23.45	26.15	28.38	29.97	34.37	34.73	40.25	43.5	46.11	47.48	47.57
Cellulose17	18.44	20.9	22.78	24.97	24.97	26.8	29.99	32.13	33.61	34.48	36.37	38.99	39.58
Cellulose18	19.22	21.6	23.61	26.14	26.64	28.55	31.52	33.54	35.06	35.79	37.51	38.76	39.3
Fuji FF1	15.46	19.39	21.36	22.82	23.57	24.46	25.17	25.73	26.59	27.75	29.34	30.21	30.15
Fuji FF2	16	19.95	22.27	24.4	25.42	26.81	27.3	28.3	29.31	30.53	30.98	32.01	31.85
Fuji FF3	16.63	20.89	22.88	24.22	24.72	25.69	28.62	29.05	29.03	30.53	32.51	31.96	33.49
Fuji FF4	16.89	20.58	23.24	25.72	26.49	27.52	30.35	30.06	30.34	30.55	32.71	33.58	35.38
Fuji FF5	17.07	20.58	22.31	23.85	24.68	25.4	26.75	27.12	28.31	28.84	30.07	31.46	32.6
Fuji FF6	17.07	19.83	22.46	23.64	24.65	25.67	27.75	29.15	30.5	30.66	31.37	32.65	34.38
Fuji FF7	17.5	20.32	22.98	24.14	24.98	26.76	28.2	29.68	31.69	31.69	30.31	32.58	33.74
Fuji FF8	17.52	20.9	23.26	24.67	25.97	28.4	30.25	30.21	32.5	32.23	32.17	34.54	35.18
Fuji FF9	17.84	21.32	23.6	24.18	25.38	27.36	29.15	29.91	32.69	33.93	33.43	34.97	36.04
Fuji FF10	18.82	21.4	24.11	25.26	25.86	26.72	27.78	28.51	29.98	30.97	31.46	31.27	32.63
Fuji FF11	15.28	20.26	22.81	25.04	25.67	27.18	29.18	30.33	31	32.4	34.67	32.82	35.57
Fuji FF12	15.69	19.71	23.52	25.1	27.49	28.54	30.07	30.26	30.81	31.95	30.79	31.95	33.28
Fuji FF13	16.24	21.69	24.23	25.98	28.32	29.65	30.7	32.21	33.98	35.52	35.52	35.2	37.79
Fuji FF14	16.72	22.39	24.88	26.51	28.99	31.16	33.13	35.66	37.94	40.08	41.12	43.54	45.01
Fuji FF15	18.1	20.31	22.72	24.72	26.79	28	29.34	32.7	34.09	36.64	36.64	35.9	35.91
Fuji FF16	18.37	20.84	21.95	23.62	26.25	27.35	27.68	30.51	31.58	33.61	35.75	34.24	33.59
Fuji FF17	18.5	21.41	24.25	26.42	26.89	30.15	31.06	33.25	36.35	38.19	40.59	41.25	43.85
Fuji FF18	18.87	21.56	23.84	25.86	25.52	27.78	28.7	30.08	32.13	33.72	36.58	36.59	36.97

## Sheet: Figure 1B
	5wk	6wk	7wk	8wk	9wk	10wk	11wk	12wk	13wk	14wk	15wk	16wk
Cellulose1	37.19	64.21	56.19	64.77	80.45	72.69	74.43	58.06	45.49	38.62	45.98	43.69
Cellulose2	38	59.42	55.2	54.94	53.87	47	62.14	46.9	57.67	43.2	48.84	46.96
Cellulose3	36.05	43.07	46.76	40.31	42.82	40.39	43.69	42.03	42.44	22.83	42.09	42.54
Cellulose4	42.36	57.84	50.31	52.58	55.46	46.64	47.25	47.16	41.87	29.86	46.84	47.37
Cellulose5	37.05	44.08	41.27	42.3	49.04	41.49	40.72	43.03	42.7	41.54	42.18	45.27
Cellulose6	52.015	63.83	102.72	83.21	77.46	76.285	78.315	98.185	100.94	85.34	50.785	49.07
Cellulose7	47.07	70.14	64.85	69.59	73.15	46.93	67.4	53.03	49.5	37.7	48.94	47.55
Cellulose8	50.41	70.33	52.18	45.56	63.56	51.78	59.73	74.82	66.12	54.31	50.67	47.23
Cellulose9	42.88	54.9	63.82	48.06	49.62	39.53	44.37	41.16	40.19	41.76	43.98	35.72
Fuji FF1	31.46	35.59	35.09	34.38	35.95	34.49	38.94	40.62	39.89	38.81	43.03	42.35
Fuji FF2	27.83	39.61	51.74	60.77	65.66	49.4	46.71	53.74	64.15	50.54	44.91	58.22
Fuji FF3	31.58	33.23	34.18	32.19	34.75	36.62	30.22	40.83	37	35.32	42.09	45.19
Fuji FF4	32.99	35.6	34.87	36.21	41	40.23	37.25	44.31	38.15	28.08	46.39	47
Fuji FF5	33.51	34.94	35.81	35.16	42.03	39.09	40.04	44.07	41.86	30.01	43.12	44.49
Fuji FF6	39.245	68.4	52.385	60.97	61.935	46.185	66.78	54.24	62.79	52.985	53.545	48.345
Fuji FF7	38.32	60.97	62.21	75.69	53.22	37.93	54.17	55.19	60.56	37.68	58.04	54.17
Fuji FF8	34.97	52.25	54.8	64.58	47.46	38.73	49.67	47.31	51.71	44.61	47.73	43.38
Fuji FF9	37.3	58.25	36.2	61.34	48.16	34.28	49.04	51.63	51.91	44.98	41.11	47.88

## Sheet: Figure 1C
	Cellulose	Fuji FF
1	681.77	450.6
2	614.14	613.28
3	485.02	433.2
4	565.54	462.08
5	510.67	464.13
6	918.155	667.805
7	675.85	648.15
8	686.7	577.2
9	545.99	562.08

## Sheet: Figure 1D
	Liver	Cecum	testis	kidney	epiWAT	periWAT	subWAT
Cellulose1	1.16	0.13	0.095	0.185	0.885	0.445	0.44
Cellulose2	1.06	0.21	0.1	0.195	0.82	0.395	0.38
Cellulose3	1.03	0.15	0.09	0.185	0.71	0.325	0.31
Cellulose4	1.38	0.15	0.085	0.2	1.085	0.59	0.57
Cellulose5	1.01	0.1	0.11	0.19	0.89	0.435	0.4
Cellulose6	0.96	0.16	0.105	0.2	0.87	0.465	0.42
Cellulose7	1.2	0.09	0.095	0.19	1.11	0.565	0.75
Cellulose8	1.11	0.11	0.1	0.185	0.94	0.55	0.6
Cellulose9	1.32	0.19	0.105	0.17	1.375	0.635	0.82
Cellulose10	1.48	0.14	0.1	0.21	1.32	0.6	0.84
Cellulose11	1	0.07	0.095	0.16	0.78	0.345	0.43
Cellulose12	1.06	0.17	0.1	0.18	1.145	0.57	0.57
Cellulose13	1.66	0.12	0.1	0.185	1.275	0.68	1.1
Cellulose14	1.2	0.09	0.095	0.17	1.49	0.65	0.93
Cellulose15	1.12	0.13	0.09	0.165	1.41	0.565	0.72
Cellulose16	1.77	0.14	0.095	0.18	1.225	0.66	1.05
Cellulose17	1.15	0.13	0.1	0.18	1.37	0.525	0.68
Cellulose18	1.21	0.13	0.095	0.16	1.14	0.525	0.72
Fuji FF1	0.89	0.27	0.095	0.195	0.39	0.19	0.23
Fuji FF2	1.05	0.39	0.095	0.185	0.35	0.165	0.18
Fuji FF3	1.02	0.35	0.085	0.205	0.565	0.29	0.22
Fuji FF4	1.2	0.34	0.095	0.22	0.525	0.26	0.22
Fuji FF5	1.12	0.4	0.105	0.17	0.595	0.295	0.33
Fuji FF6	1.02	0.51	0.085	0.17	0.675	0.425	0.43
Fuji FF7	1.36	0.34	0.1	0.19	0.44	0.28	0.31
Fuji FF8	1.19	0.42	0.1	0.17	0.81	0.385	0.32
Fuji FF9	1.05	0.34	0.085	0.16	0.87	0.495	0.46
Fuji FF10	0.98	0.33	0.105	0.185	0.44	0.225	0.2
Fuji FF11	1.07	0.28	0.08	0.175	0.655	0.3	0.33
Fuji FF12	1.26	0.36	0.085	0.19	0.23	0.055	0.15
Fuji FF13	1.21	0.32	0.105	0.2	0.675	0.26	0.35
Fuji FF14	1.33	0.32	0.085	0.175	1.35	0.57	0.73
Fuji FF15	1.16	0.21	0.1	0.195	0.68	0.28	0.25
Fuji FF16	1.05	0.25	0.1	0.17	0.51	0.175	0.25
Fuji FF17	1.36	0.26	0.085	0.175	1.015	0.58	0.72
Fuji FF18	0.98	0.24	0.09	0.165	0.87	0.365	0.39

## Sheet: Figure 1E
	Cellulose	Fuji FF
1	215	178
2	209	174
3	189	192
4	187	197
5	184	188
6	173	183
7	173	196
8	165	218
9	194	160
10	243	159
11	123	167
12	225	124
13	217	302
14	189	216
15	203	98
16	241	143
17	206	219
18	177	189

## Sheet: Figure 1F
	Cellulose	Fuji FF
1	50.9899	38.4661
2	54.5682	49.2008
3	37.5715	45.6226
4	44.728	52.779
5	50.9899	38.4661
6	40.2552	50.0954
7	45.6226	50.9899
8	46.5171	75.143
9	56.3573	70.6702
10	73.3539	68.8811
11	68.8811	67.9866
12	69.7757	71.5648
13	83.1941	82.2995
14	79.6158	74.2485
15	87.6669	80.5104
16	82.2995	94.8234
17	68.8811
18	69.7757

## Sheet: Figure 1G
	Cellulose	Fuji FF
1	139.497	115.799
2	149.192	96.4094
3	209.515	113.645
4	184.74	127.648
5	147.038	91.0234
6	195.512	97.4866
7	217.056	94.255
8	205.207	114.722
9	158.887	95.3322
10	180.431	116.876
11	140.575	110.413
12	179.354	105.027
13	171.813	101.795
14	168.582	80.2514
15	182.585	102.873
16	177.199	131.957
17	198.743	111.49
18	245.063

## Sheet: Figure 2A
	Cellulose1	Cellulose2	Cellulose3	Cellulose4	Cellulose5	Cellulose6	Cellulose7	Cellulose8	Cellulose9	Cellulose10	Cellulose11	Cellulose12	Fuji FF1	Fuji FF2	Fuji FF3	Fuji FF4	Fuji FF5	Fuji FF6	Fuji FF7	Fuji FF8	Fuji FF9	Fuji FF10
08:00:00	0.788182	0.836667	0.7825	0.808333	0.764167	0.795455	0.831545	0.801273	0.769	0.749091	0.723364	0.789167	0.754545	0.84	0.808182	0.850833	0.781273	0.748167	0.733091	0.754193	0.784833	0.640273
09:00:00	0.893636	0.756364	0.763636	0.828182	0.810909	0.805833	0.860167	0.803	0.787818	0.821091	0.789364	0.816455	0.757273	0.789091	0.790833	0.815455	0.757818	0.814636	0.764917	0.765334	0.778	0.684167
10:00:00	0.921667	0.821667	0.866364	0.8525	0.849167	0.872727	0.921091	0.866	0.848833	0.880833	0.78575	0.877	0.831667	0.838182	0.815455	0.82	0.837417	0.9445	0.861091	0.830841	0.841	0.700818
11:00:00	0.932727	0.873636	0.876667	0.9	0.875455	0.857273	0.901	0.887909	0.859545	0.910818	0.806909	0.867364	0.861818	0.798333	0.824167	0.7925	0.912727	0.919091	0.916455	0.860707	0.877417	0.756083
12:00:00	0.9275	0.872727	0.833636	0.880909	0.921818	0.82	0.840833	0.847364	0.925182	0.917636	0.858417	0.865455	0.938182	0.872727	0.791818	0.806364	0.864091	0.848727	0.941583	0.897723	0.932	0.808909
13:00:00	0.988182	0.829167	0.895455	0.890833	0.913333	0.855455	0.866636	0.880917	0.93225	0.9185	0.767636	0.894333	0.906667	0.799167	0.835455	0.8375	0.886583	0.858727	0.941909	0.885213	0.934667	0.866455
14:00:00	0.906364	0.903636	0.866667	0.870909	0.860909	0.878333	0.861	0.804364	0.892727	0.945182	0.829364	0.838545	0.903636	0.866364	0.825833	0.851818	0.831273	0.78825	0.892833	0.900875	0.868636	0.854833
15:00:00	0.945	0.836667	0.921818	0.871667	0.898333	0.924545	0.871917	0.829909	0.892333	0.941455	0.821083	0.8805	0.940833	0.862727	0.800909	0.851818	0.855545	0.891	0.903273	0.926496	0.932091	0.898182
16:00:00	0.867273	0.908182	0.834545	0.893636	0.919091	0.884545	0.905818	0.855417	0.937455	0.932333	0.890182	0.955	0.88	0.841667	0.8475	0.851667	0.874167	0.875545	0.878273	0.928152	0.909167	0.940583
17:00:00	0.984167	0.830909	0.8775	0.906364	0.938182	0.928333	0.908818	0.846364	0.939273	0.971545	0.93425	0.947545	0.829091	0.813636	0.77	0.880909	0.893545	0.8675	0.942	0.945363	0.893909	0.975818
18:00:00	0.9	0.910833	0.884545	0.889167	0.821667	0.892727	0.9015	0.87225	0.930167	0.941083	0.827636	0.951167	0.916667	0.86	0.802727	0.824167	0.906545	0.875	0.953727	0.933027	0.9415	1.00018
19:00:00	0.933636	0.957273	0.899091	0.932727	0.921818	0.884167	0.941545	0.889182	0.958909	0.946455	0.822455	0.929	0.964545	0.825455	0.880833	0.893636	0.822917	0.917917	0.89125	0.88358	0.969364	0.950667
20:00:00	0.909167	0.945	0.9425	0.909167	0.892727	0.915455	0.828667	0.840727	0.884583	0.898455	0.829917	0.844833	0.970833	0.866364	0.857273	0.875455	0.845091	0.871455	0.877182	0.849132	0.909636	0.922182
21:00:00	0.850909	0.881818	0.86	0.89	0.780833	0.880909	0.760091	0.824	0.875	0.856083	0.815273	0.807818	0.827273	0.813333	0.814167	0.870909	0.823917	0.798636	0.792273	0.803236	0.788083	0.806083
22:00:00	0.843333	0.815455	0.8975	0.842727	0.809091	0.864167	0.806455	0.775909	0.834455	0.857727	0.868273	0.793364	0.802727	0.745455	0.742727	0.7925	0.773091	0.852833	0.797333	0.774563	0.782	0.725909
23:00:00	0.903636	0.771667	0.87	0.825	0.807273	0.839091	0.79725	0.805167	0.826917	0.855333	0.800083	0.847	0.765	0.743333	0.731818	0.825455	0.756182	0.799455	0.830273	0.796014	0.800182	0.675455
1900-01-01	0.962727	0.820909	0.858182	0.839091	0.834167	0.836667	0.803818	0.828364	0.846182	0.880818	0.733727	0.787667	0.780909	0.722727	0.767273	0.765455	0.78775	0.84725	0.805667	0.799417	0.81775	0.684636
1900-01-01 01:00:00	0.941667	0.858333	0.843333	0.875455	0.839091	0.852727	0.848583	0.808909	0.853667	0.893182	0.803182	0.776818	0.763333	0.789091	0.779167	0.821667	0.782273	0.848182	0.836636	0.774912	0.765545	0.702583
1900-01-01 02:00:00	0.906364	0.852727	0.840909	0.881667	0.847273	0.81	0.841182	0.871333	0.791091	0.883083	0.7615	0.826	0.781818	0.7525	0.788182	0.821818	0.8125	0.818636	0.836909	0.765265	0.797	0.834818
1900-01-01 03:00:00	0.904167	0.835455	0.845833	0.845455	0.8325	0.845	0.870455	0.817727	0.825545	0.883273	0.810091	0.792	0.786364	0.758182	0.808182	0.78	0.811636	0.86775	0.851	0.815787	0.792583	0.852091
1900-01-01 04:00:00	0.876364	0.811667	0.850909	0.884545	0.846364	0.824545	0.869417	0.83	0.8295	0.815333	0.84	0.830636	0.813333	0.761667	0.8175	0.828182	0.812364	0.877273	0.855455	0.857666	0.787091	0.848917
1900-01-01 05:00:00	0.87	0.866364	0.85	0.9025	0.879167	0.831667	0.865364	0.829727	0.842182	0.866273	0.838917	0.8365	0.799091	0.780909	0.834545	0.843636	0.84925	0.847083	0.862667	0.788217	0.770273	0.824182
1900-01-01 06:00:00	0.959167	0.8525	0.8575	0.805455	0.915455	0.83	0.828667	0.851818	0.827417	0.862	0.772727	0.821636	0.813333	0.772727	0.8	0.845	0.840818	0.873636	0.845545	0.817628	0.795083	0.902917
1900-01-01 07:00:00	0.858182	0.847273	0.856364	0.8	0.8	0.863636	0.749545	0.798167	0.815182	0.845667	0.786333	0.837273	0.739091	0.789167	0.822727	0.818182	0.858083	0.904091	0.757727	0.806636	0.838455	0.772091

## Sheet: Figure 2B
	Light	Dark
Cellulose1	0.915694	0.898807
Cellulose2	0.861477	0.846597
Cellulose3	0.858535	0.864419
Cellulose4	0.877102	0.858422
Cellulose5	0.874571	0.840328
Cellulose6	0.866616	0.849489
Cellulose7	0.884323	0.822458
Cellulose8	0.848662	0.823487
Cellulose9	0.889458	0.837643
Cellulose10	0.906335	0.866436
Cellulose11	0.821367	0.805002
Cellulose12	0.884294	0.816795
Fuji FF1	0.873744	0.803592
Fuji FF2	0.833946	0.774621
Fuji FF3	0.816143	0.796963
Fuji FF4	0.839722	0.824021
Fuji FF5	0.851992	0.812746
Fuji FF6	0.862422	0.850523
Fuji FF7	0.885033	0.829056
Fuji FF8	0.875959	0.804039
Fuji FF9	0.888549	0.80364
Fuji FF10	0.839747	0.795989

## Sheet: Figure 2C
	Cellulose1	Cellulose2	Cellulose3	Cellulose4	Cellulose5	Cellulose6	Cellulose7	Cellulose8	Cellulose9	Cellulose10	Cellulose11	Cellulose12	Fuji FF1	Fuji FF2	Fuji FF3	Fuji FF4	Fuji FF5	Fuji FF6	Fuji FF7	Fuji FF8	Fuji FF9	Fuji FF10
08:00:00	10.1522	17.402	12.1329	12.8636	11.4773	15.6797	10.6913	14.9527	13.9847	13.7838	14.9872	14.3553	14.7469	13.2925	13.3658	13.8697	17.7023	15.2965	17.0589	19.3822	17.7393	23.0155
09:00:00	9.74794	11.6885	9.93605	11.6719	11.5064	12.5458	10.4137	10.3	12.403	11.1914	9.74792	10.4663	10.7379	11.3176	10.2596	13.5838	11.814	10.8867	14.0011	14.7858	13.4604	16.6194
10:00:00	9.03942	11.3291	10.7369	12.1711	9.80764	12.3538	9.49339	10.2986	11.4086	11.1207	10.7513	11.233	10.9198	12.7687	9.31998	13.6188	12.1775	10.9265	13.1602	14.3314	11.3428	14.7795
11:00:00	8.83765	11.6704	11.2436	11.2905	9.49894	12.7396	9.3954	9.6467	11.0784	9.36049	9.89163	12.4175	10.8168	10.5898	9.15824	10.4585	10.6927	10.9281	12.2647	13.071	12.8201	12.2871
12:00:00	8.74244	12.8604	9.70994	11.6238	10.1019	11.971	10.6366	8.88415	10.0024	10.0055	11.2142	10.6683	11.1383	13.75	10.8018	10.9425	11.1717	11.7299	12.0339	13	10.8059	13.1828
13:00:00	9.186	9.69782	10.3241	11.0195	9.87304	11.6729	9.46272	8.94756	10.4568	10.8619	12.9739	12.7397	8.96425	10.0718	9.23799	11.1551	8.55274	10.3692	14.3358	15.5782	12.5255	15.3805
14:00:00	8.73301	12.3757	9.8061	10.6354	8.70853	11.3257	9.80775	9.05789	11.8772	9.41034	8.98689	12.5972	10.3776	11.9165	10.1066	11.6483	9.4496	10.5336	12.2484	12.0607	14.1127	11.0839
15:00:00	10.8541	10.178	12.5722	12.8009	9.36394	13.2667	9.97315	9.30555	10.2935	12.3843	9.93081	10.8316	12.0483	11.8458	8.97861	10.933	9.42245	9.67977	12.0866	13.2746	10.7769	12.5341
16:00:00	7.93884	11.641	10.3562	9.98326	8.97013	11.8558	9.47376	9.67913	9.71979	9.70319	9.47106	10.6326	11.9006	13.6754	11.5086	10.1241	10.3578	8.97865	12.6214	12.4485	13.2252	13.0835
17:00:00	9.38239	10.1185	10.1364	12.6807	13.5056	11.4877	8.9395	13.4024	13.2724	9.38969	10.1624	13.4426	9.98313	10.2288	9.21414	11.4491	10.6602	13.2825	11.4371	11.747	11.5648	11.2865
18:00:00	8.53948	12.4827	9.40213	10.0934	10.2898	12.2493	9.81586	10.7618	11.084	11.4303	15.845	11.9102	10.3712	13.5374	10.5364	11.5581	9.90037	12.7771	12.1672	13.7217	11.1738	11.5449
19:00:00	11.2288	11.5935	11.8442	12.1363	11.0993	11.971	9.85222	11.4186	11.2676	11.5657	9.92394	12.8946	10.4595	12.0147	12.2438	16.4433	16.7144	11.295	12.9042	13.8084	11.6717	12.8325
20:00:00	11.5703	14.0627	13.8112	15.2415	14.3757	16.5573	15.7111	15.5362	15.7873	13.6867	14.9859	17.8093	16.0289	16.0765	12.9618	14.554	14.3437	15.5931	17.6906	19.7109	19.3758	16.3291
21:00:00	14.6506	15.4962	13.1382	14.7099	14.6409	14.4532	14.2695	16.3196	14.4806	15.7144	13.1631	20.6977	17.9863	19.7424	15.317	20.4131	20.3184	17.593	21.4449	21.3976	22.5543	21.1582
22:00:00	10.7398	13.7907	14.1254	13.0956	13.2006	13.1262	15.2571	17.7022	16.1815	13.6433	10.8477	18.2224	16.7239	19.98	13.9755	15.3519	18.1796	15.2053	17.343	21.0106	21.3694	23.0212
23:00:00	10.2769	13.2919	12.2352	12.7942	13.1474	14.7529	12.783	12.8746	13.3906	15.4709	16.1757	13.7291	13.2778	19.8972	11.8617	19.4111	16.1432	15.0489	15.9502	16.2346	15.1442	24.018
1900-01-01	11.0152	13.0769	14.5226	12.9515	13.851	14.1462	14.1999	12.8095	13.9724	13.4428	13.3023	19.4566	17.2479	15.4484	10.5871	14.7164	13.3366	13.7769	20.2358	19.9755	16.8663	23.5589
1900-01-01 01:00:00	11.1774	14.0269	12.3028	12.6356	12.4004	14.2796	10.9889	12.7448	16.1441	14.761	12.3706	16.3969	12.0251	15.8799	12.1345	15.5096	14.3807	14.5883	15.881	16.8067	16.8015	17.3233
1900-01-01 02:00:00	11.1112	13.57	12.5459	13.1505	12.1164	14.1197	12.311	12.1822	14.3805	13.1384	15.2603	14.4759	13.0424	16.4879	10.8793	15.4652	15.583	15.2039	17.2009	18.6699	17.0958	13.4099
1900-01-01 03:00:00	10.7727	13.8173	13.3712	12.6239	12.9033	14.7563	11.3665	14.3068	14.6985	14.0695	11.3459	18.0173	13.0945	16.5111	10.0057	13.8537	14.7178	14.3625	16.6842	14.9285	15.8733	15.1528
1900-01-01 04:00:00	13.4278	12.9962	12.629	12.1261	11.9961	14.4748	11.9301	12.9753	13.3914	15.3514	12.2803	14.7333	12.0824	14.9775	10.5261	12.7952	15.9055	14.7123	16.0998	15.0123	15.6897	16.474
1900-01-01 05:00:00	9.973	12.3478	13.0915	12.9517	12.2903	14.0349	11.4441	11.5194	13.7097	12.9736	11.7458	15.7483	12.7402	15.4791	10.7645	13.955	14.112	14.0913	16.7446	16.4378	18.2275	13.2448
1900-01-01 06:00:00	11.0039	14.6044	14.2164	12.7171	13.8077	14.152	14.2775	12.4024	14.9006	14.7511	15.6978	15.2639	15.2825	16.485	10.7475	17.3116	13.7541	14.4478	18.0595	15.7142	15.3347	14.2482
1900-01-01 07:00:00	11.7764	13.4178	13.322	13.3954	13.7798	14.9036	13.4887	15.6557	15.4923	14.4156	12.734	15.9139	13.4116	16.4738	14.5062	13.8052	15.4625	14.0843	22.7583	18.4525	16.7546	22.1023

[truncated: 4 more sheets: Figure 2D, Figure 2E, Figure 2F, Figure 3]
